# Supplementary material for: Conserved gene signatures shared among MAPT mutations reveal defects in calcium signaling
Source: PubMed Central journal article supplement (PMC9948093; doi:10.3389/fmolb.2023.1051494), 2023-02-09

# Supplementary Figure S1

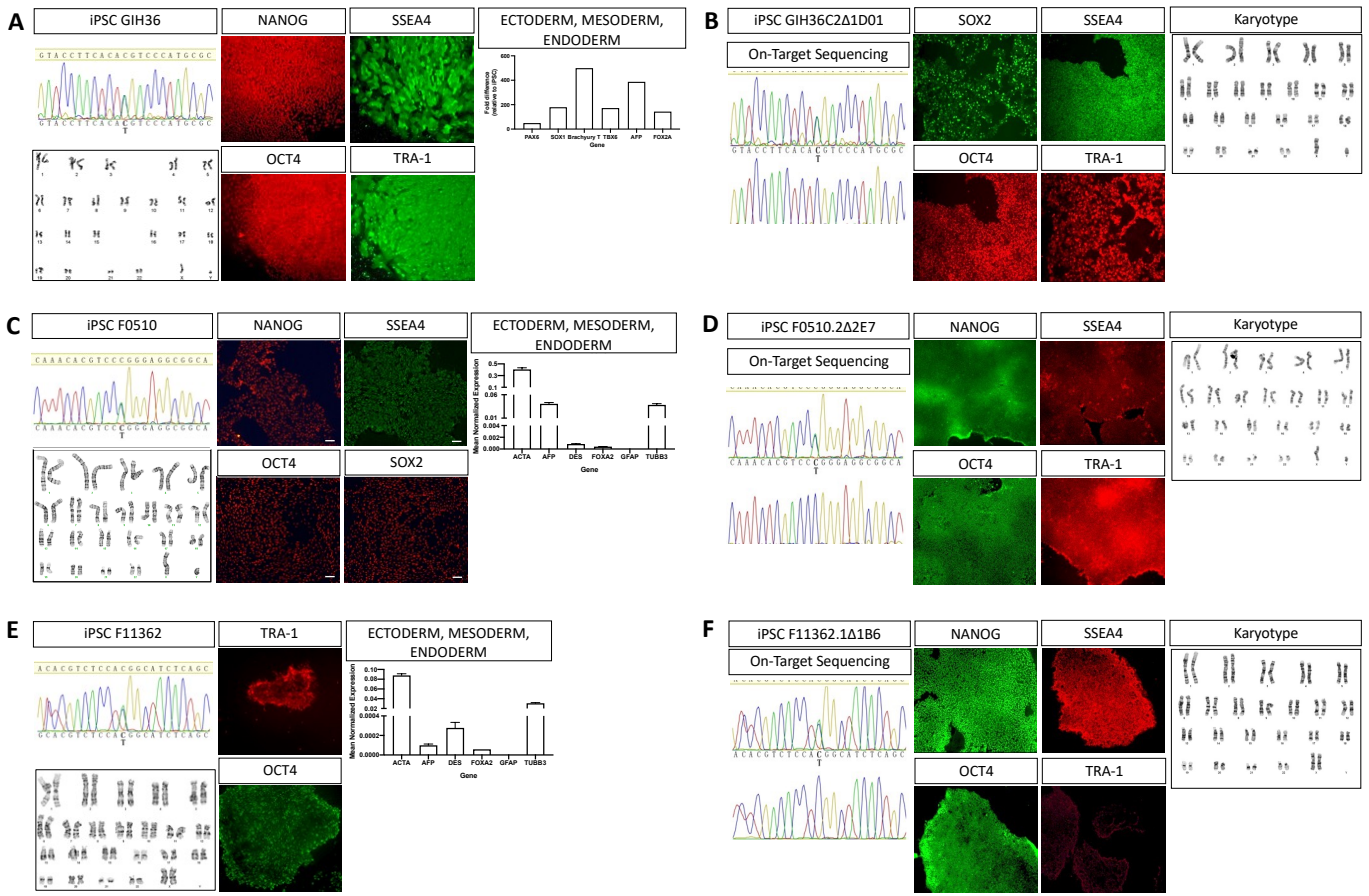

# Supplementary Figure S2

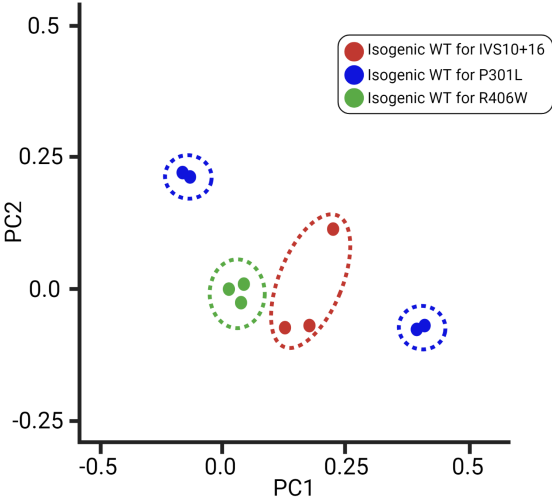

# Supplementary Figure S3

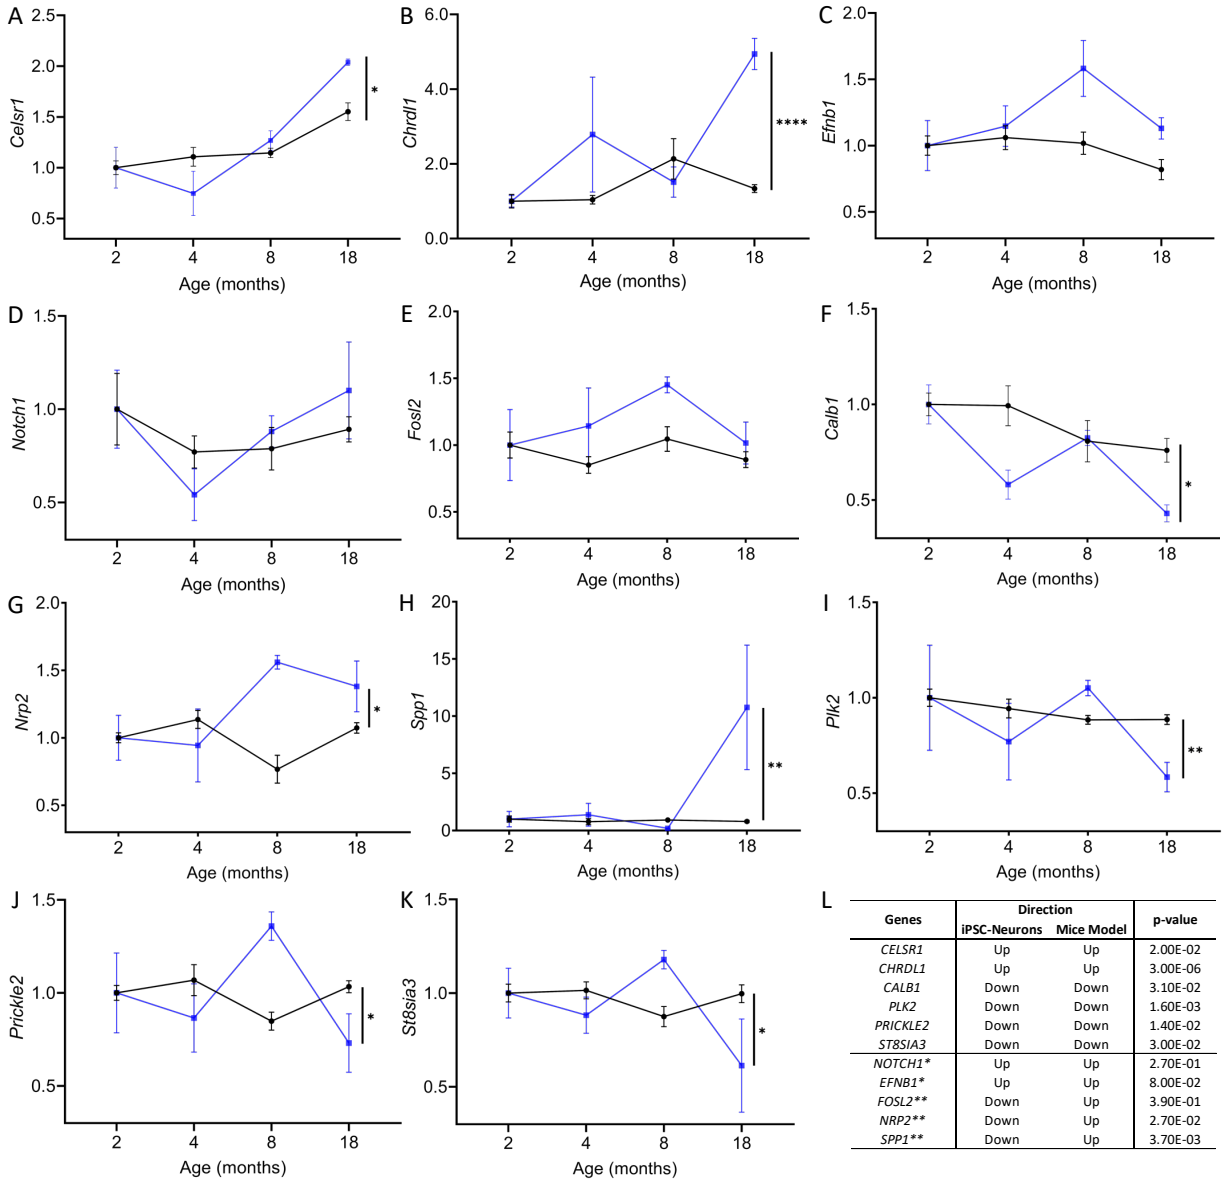

Supplement: DataSheet1.pdf [file DataSheet1.pdf]
